# Supplementary material for: Enumeration and Characterization of Circulating Tumor Cells in Patients with Hepatocellular Carcinoma Undergoing Transarterial Chemoembolization
Source: MDPI journal article supplement (doi:10.3390/ijms24032558), 2023-01-29
Supplement: s1 [file s1]

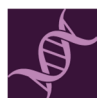

**Supplementary Table S1.** Relationship between clinicopathological characteristics of patients and CD45<sup>+</sup> CK<sup>+</sup> cell count. Individual count of double positive cells and the sum of CD45<sup>+</sup> CK<sup>+</sup> CTCs and double positive cells are shown.

| Variable                  | Patients n (%) | Cell count n=37; 100.0%)                |       |                                                  |       |
|---------------------------|----------------|-----------------------------------------|-------|--------------------------------------------------|-------|
|                           |                | CD45 <sup>+</sup> CK <sup>+</sup> cells |       | CTCs and CD45 <sup>+</sup> CK <sup>+</sup> cells |       |
|                           |                | Median (IQR)                            | p     | Median (IQR)                                     | p     |
| Age (years)               |                |                                         |       |                                                  |       |
| - <65                     | 18 (48.6%)     | 27.0 (16.-90.5)                         | 0.796 | 58.3 (37.5-186.3)                                | 0.574 |
| - ≥65                     | 19 (51.4%)     | 30.0 (15.0-54.0)                        |       | 68.0 (44.0-116.0)                                |       |
| Sex (male)                | 34 (91.9%)     | 29.0 (17.5-60.3)                        | 0.242 | 68.0 (44.8-138.3)                                | 0.559 |
| Etiology                  |                |                                         |       |                                                  |       |
| - Hepatitis C (yes)       | 14(37.8%)      | 31.0 (15.5-134.0)                       | 0.364 | 57.0 (44.8-398.5)                                | 0.616 |
| - Hepatitis B (yes)       | 5 (13.5%)      | 48.0 (18.5-76.0)                        | 0.437 | 116.0 (50.0-138.5)                               | 0.625 |
| - Alcohol (yes)           | 27 (73.0%)     | 26.0 (18.0-58.0)                        | 0.932 | 68.0 (44.0-139.0)                                | 0.918 |
| - NAFLD (yes)             | 4 (10.8%)      | 16.0 (4.0-85.0)                         | 0.240 | 52.0 (26.3-224.8)                                | 0.509 |
| Child-Pugh score          |                |                                         |       |                                                  |       |
| - A                       | 32 (86.5%)     | 29.0 (16.5-57.0)                        | 0.706 | 68.0 (44.3-138.0)                                | 0.982 |
| - B                       | 5 (13.5%)      | 23.0 (9.0-121.0)                        |       | 46.0 (27.0-1017.5)                               |       |
| MELD score                |                |                                         |       |                                                  |       |
| - <9                      | 14 (37.8%)     | 28.5 (16.0-61.8)                        | 0.900 | 57.0 (43.03-138.3)                               | 0.802 |
| - ≥9                      | 23 (62.2%)     | 28.0 (15.0-60.0)                        |       | 68.0 (37.0-151.0)                                |       |
| BCLC stage                |                |                                         |       |                                                  |       |
| - 0-A                     | 26 (70.3%)     | 30.0 (15.8-76.0)                        | 0.572 | 69.0 (43.3-143.3)                                | 0.702 |
| - B-D                     | 11 (29.7%)     | 25.0 (18.0-48.0)                        |       | 64.0 (34.0-138.0)                                |       |
| Portal Hypertension (yes) | 31 (83.8%)     | 28.0 (16.0-60.0)                        | 0.695 | 68.0 (44.0-139.0)                                | 0.821 |
| Number of nodules         |                |                                         |       |                                                  |       |
| - Single nodule           | 18 (48.6%)     | 24.5 (15.5-48.3)                        | 0.638 | 68.0 (37.8-141.3)                                | 0.761 |
| - Multinodular            | 19 (51.4%)     | 32.0 (16.0-67.0)                        |       | 64.0 (44.0-139.0)                                |       |
| Main nodule diameter (cm) |                |                                         |       |                                                  |       |
| - <3                      | 17 (45.9%)     | 54.0 (21.0-101.5)                       | 0.024 | 116.0 (48.5-272.5)                               | 0.038 |
| - ≥3                      | 20 (54.1%)     | 22.5 (14.5-32.0)                        |       | 47.0 (36.3-73.3)                                 |       |
| Total tumor diameter (cm) |                |                                         |       |                                                  |       |
| - <5                      | 24 (64.9%)     | 29.0 (16.5-71.5)                        | 0.316 | 69.0 (45.3-151.5)                                | 0.408 |
| - ≥5                      | 13 (35.1%)     | 25.0 (13.5-51.0)                        |       | 53.0 (33.0-138.5)                                |       |
| Number of treated nodules |                |                                         |       |                                                  |       |
| - Single nodule           | 22 (59.5%)     | 24.0 (16.0-48.3)                        | 0.536 | 66.0 (43.3-141.3)                                | 0.901 |
| - >1 nodule               | 15 (40.5%)     | 36.0 (15.0-67.0)                        |       | 107.0 (34.0-139.0)                               |       |
| AFP (ng/ml)               |                |                                         |       |                                                  |       |
| - Normal (<9)             | 17 (45.9%)     | 32.0 (15.0-66.5)                        | 0.779 | 70.0 (37.0-153.5)                                | 0.499 |
| - Abnormal (≥9)           | 18 (48.6%)     | 26.5 (15.8-55.0)                        |       | 58.5 (44.8-120.0)                                |       |
| - missing                 | 2 (5.4%)       |                                         |       |                                                  |       |

|                           |            |                  |       |                   |       |
|---------------------------|------------|------------------|-------|-------------------|-------|
| AST (U/L)                 |            |                  |       |                   |       |
| - Normal (<35)            | 18 (48.6%) | 25.5 (14.0-61.8) |       | 66.0 (35.5-152.3) |       |
| - Abnormal ( $\geq 35$ )  | 19 (51.4%) | 32.0 (16.0-58.0) | 0.638 | 68.0 (44.0-132.0) | 0.939 |
| ALT (U/L)                 |            |                  |       |                   |       |
| - Normal (<27)            | 19 (51.4%) | 25.0 (18.0-48.0) |       | 53.0 (36.0-138.0) |       |
| - Abnormal ( $\geq 27$ )  | 18 (48.6%) | 37.0 (15.8-76.0) | 0.475 | 72.5 (46.5-143.3) | 0.386 |
| GGT (U/L)                 |            |                  |       |                   |       |
| - Normal (<75)            | 17 (45.9%) | 25.0 (17.0-35.0) |       | 50.0 (35.5-144.5) |       |
| - Abnormal ( $\geq 75$ )  | 20 (54.1%) | 40.5 (15.3-65.3) | 0.532 | 91.0 (45.5-138.8) | 0.385 |
| Tumor vascularity         |            |                  |       |                   |       |
| - Hypervascularity        | 23 (62.2%) | 30.0 (18.0-67.0) |       | 75.0 (47.0-156.0) |       |
| - Medium/Hypo-vascularity | 14 (37.8%) | 23.0 (13.8-50.5) | 0.372 | 46.5 (31.5-119.3) | 0.060 |
